# Supplementary material
Source: publisher figshare collection journal article supplement (https://sage.figshare.com/ndownloader/files/15123116)

### Supplementary Materials

Figure 3. Funnel plot for the category of depressive disorders

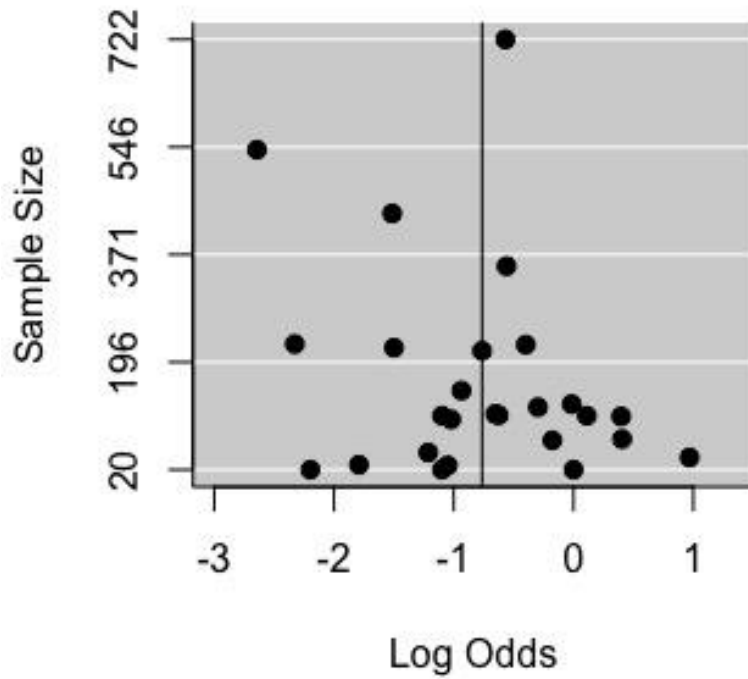

Figure 4. Funnel plot for the category of anxiety disorders

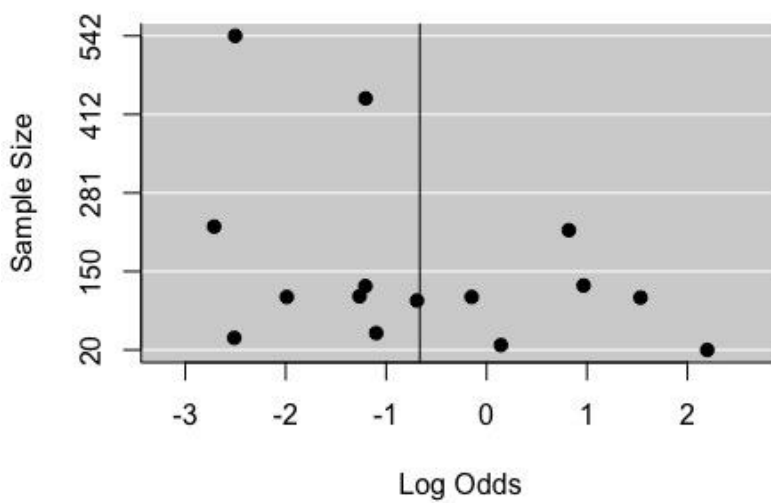

Figure 5. Funnel plot for the category of OCD

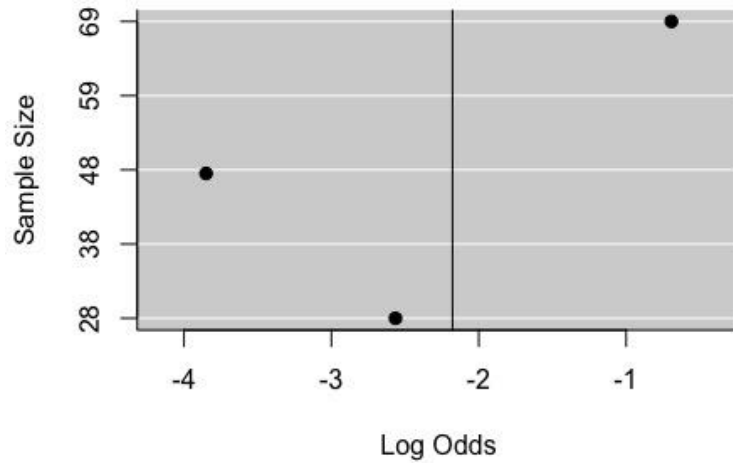

**Table 6**

*Adjusted Proportions Yielded by Trim and Fill Procedures*

|                               | <i>prop</i> | <i>adjprop</i> | <i>CI.95</i> | <i>adjCI.95</i> |
|-------------------------------|-------------|----------------|--------------|-----------------|
| Depressive Disorders          | 31%         | 31%            | 25-39%       | 25-39%          |
| Anxiety Disorders             | 34%         | 34%            | 19-52%       | 19-52%          |
| Obsessive-Compulsive Disorder | 10%         | 33%            | 1-41%        | 5-81%           |

*prop* = meta-analytic median proportion expressed as a percentage, *adjprop* = adjusted meta-analytic median proportional calculated by trim and fill procedure, *CI.95* = 95% confidence interval, *adjCI.95* = 95% confidence intervals of adjusted proportions.

Figure 6. Adjusted funnel plot for OCD using the trim and fill procedure

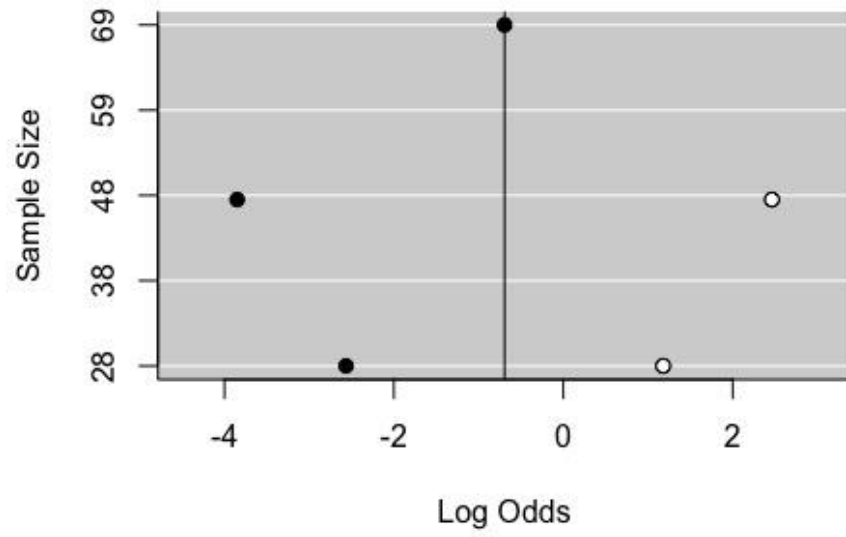

Supplement: Supplementary file 1 [file 15123116]
